# Supplementary material for: Characterization and Quantification of Polyphenols and Triterpenoids in Thinned Young Fruits of Ten Pear Varieties by UPLC-Q TRAP-MS/MS
Source: PubMed Central journal article supplement (PMC6337724; doi:10.3390/molecules24010159), 2019-01-03
Supplement: molecules-24-00159-s001.pdf [file molecules-24-00159-s001.pdf]

Article

# Characterization and quantification of polyphenols and triterpenoids in thinned young fruits of ten pear varieties by UPLC-Q TRAP-MS/MS

Liqiong Sun, Shutian Tao and Shaoling Zhang \*

Center of Pear Engineering Technology Research, State Key Laboratory of Crop Genetics and Germplasm Enhancement, Nanjing Agricultural University, Nanjing 210095, China; sarlign@163.com (L.S.); taost@njau.edu.cn (S.T.)

\* Correspondence: slzhang@njau.edu.cn; Tel.: +86-25-84396580

## (Supplementary Material)

**Figure S1:** Representative UPLC-Q TRAP-MS/MS total ion chromatogram of thinned young pears in negative ion mode. (A) the polyphenolic profiles of ‘Hongqieli’ extract, (B) the triterpenoid profiles of ‘Yali’ extract.

**Figure S2:** Representative MRM chromatograms for 102 polyphenols and 16 triterpenoids in thinned pears.

**Table S1:** The optimized MS parameters at MRM mode and summary of the intra- and inter-day precision for available analytes.

**Table S2:** Repeatability and stability for 102 polyphenols in representative pear extracts.

**Table S3:** Repeatability and stability for 16 triterpenoids in representative pear extracts.

**Table S4:** The correlation coefficients between antioxidant activity and chemical compounds in thinned young pears.

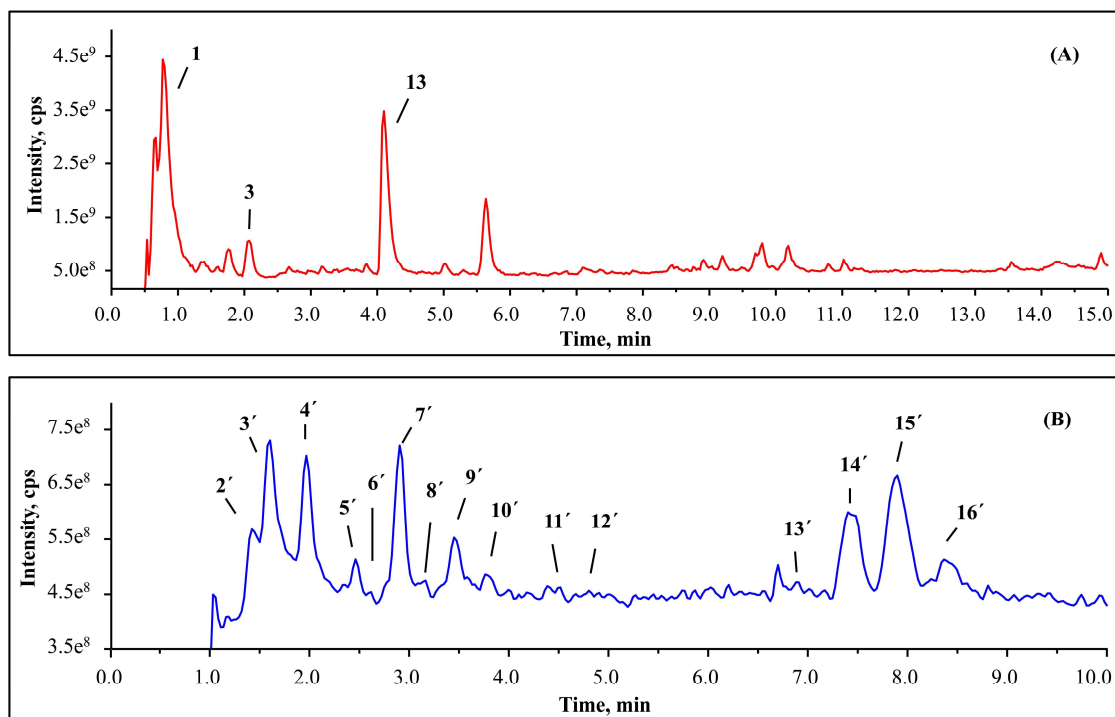

**Figure 1.** Representative UPLC-Q TRAP-MS/MS total ion chromatogram of thinned young pears in negative ion mode. (A) the polyphenolic profiles of 'Hongqieli' extract, (B) the triterpenoid profiles of 'Yali' extract.

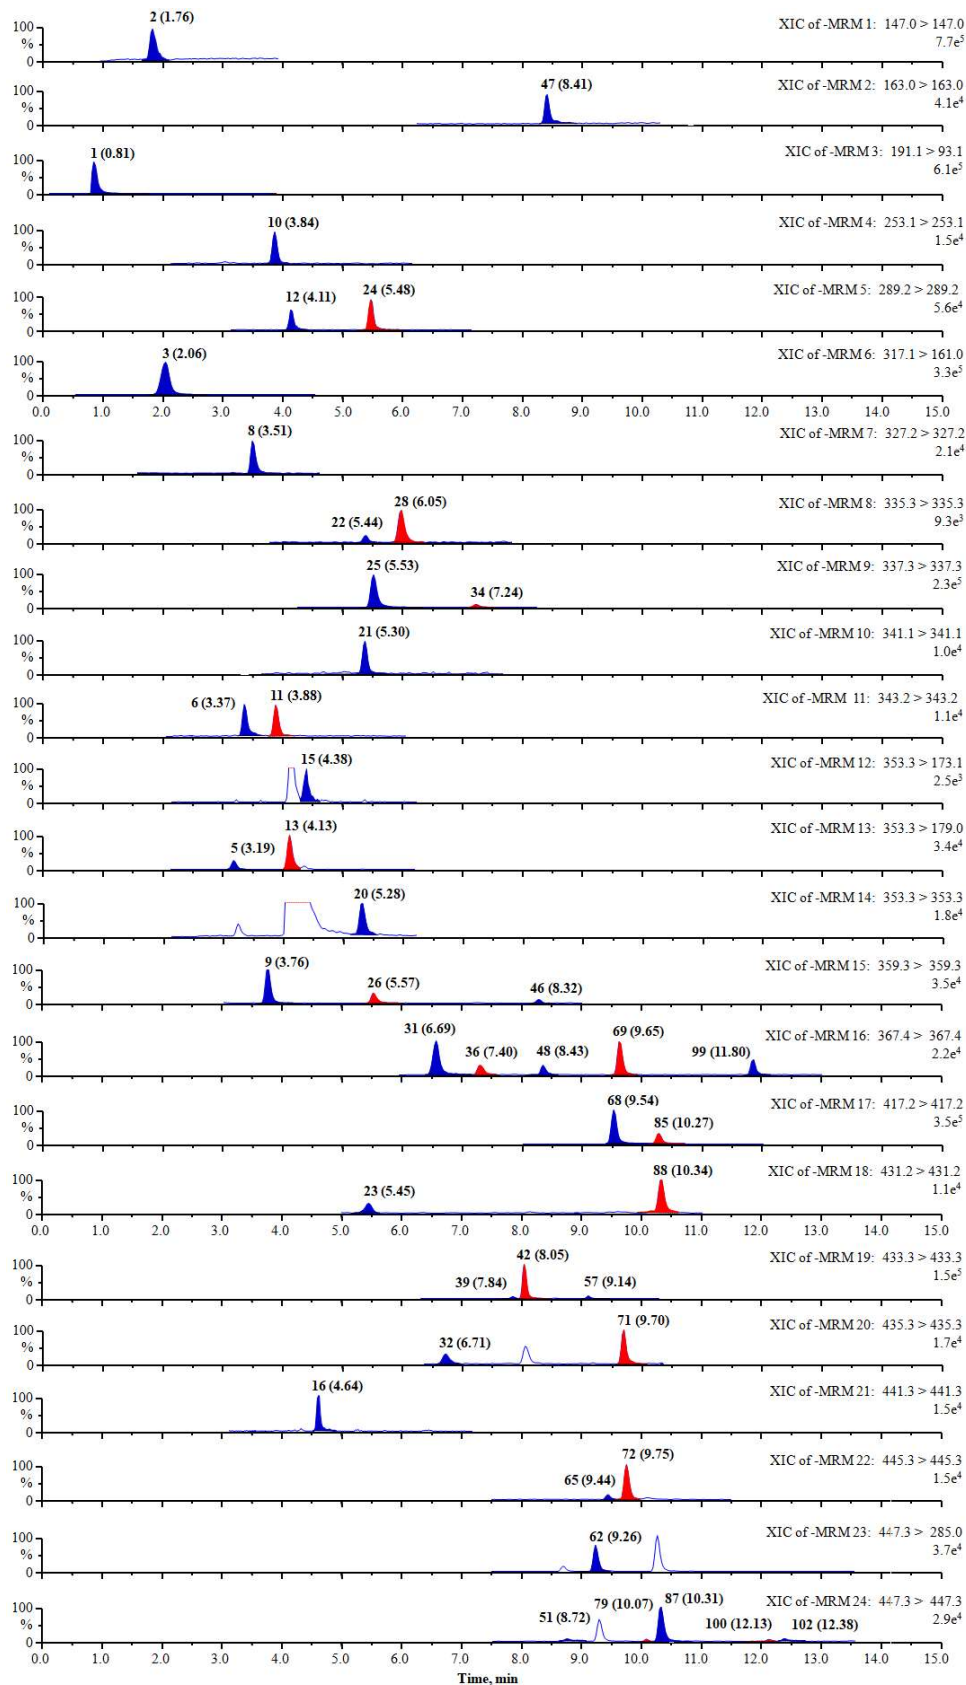

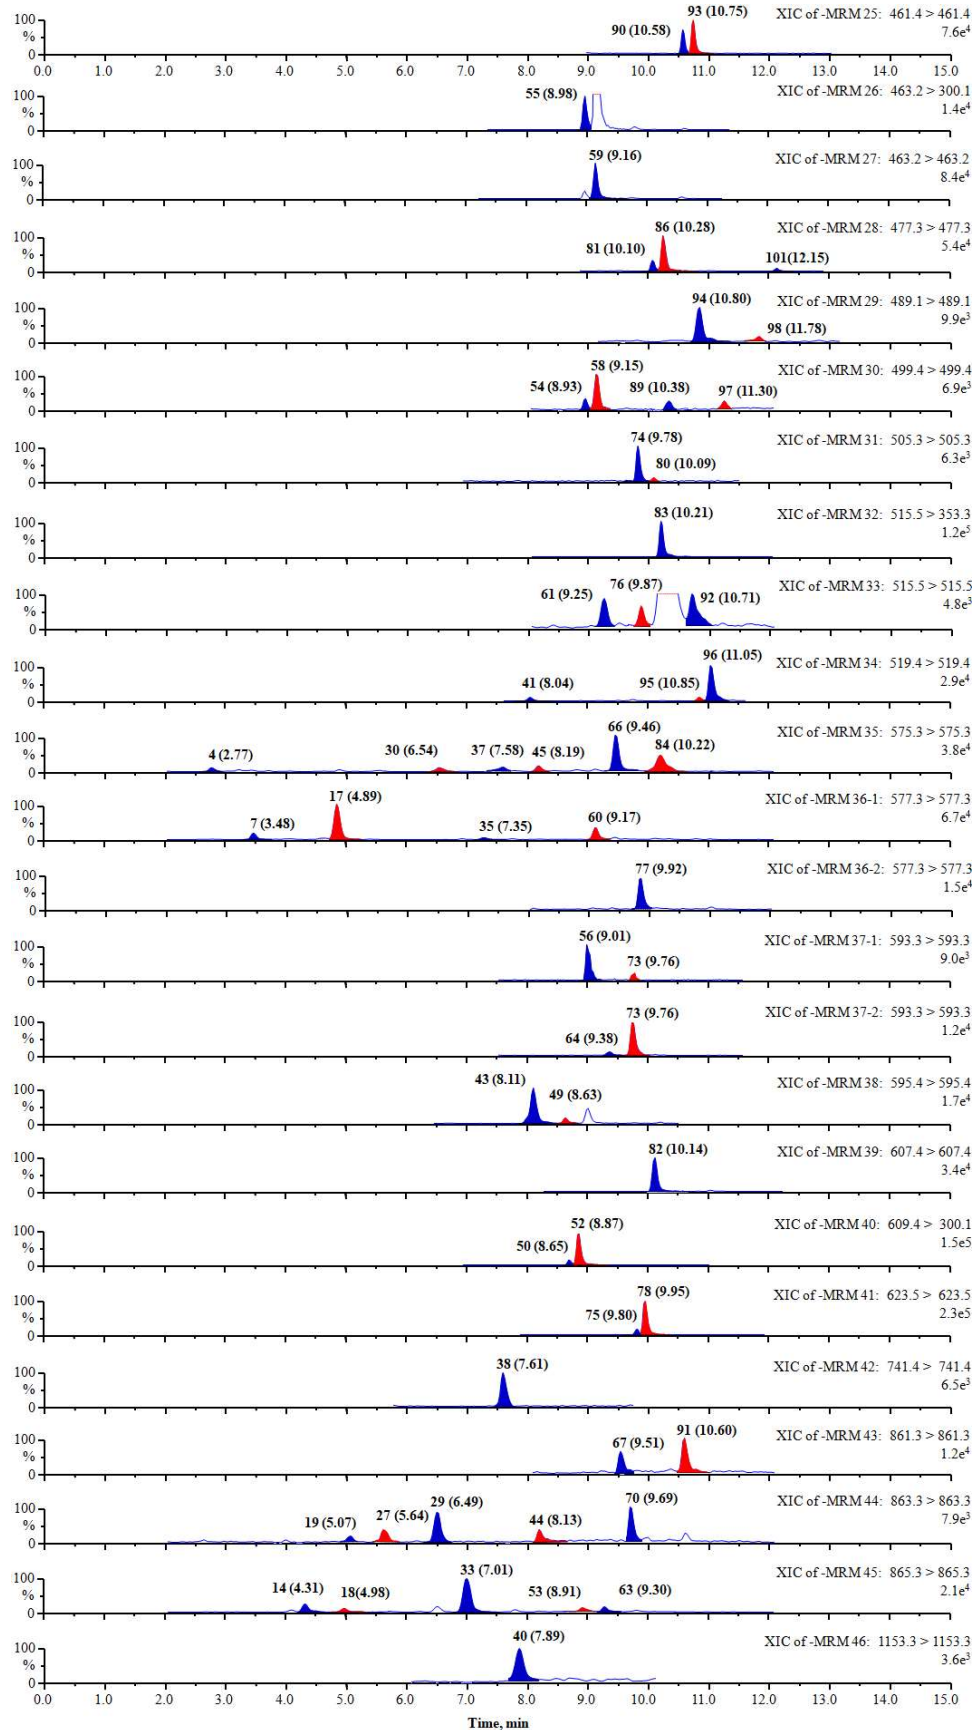

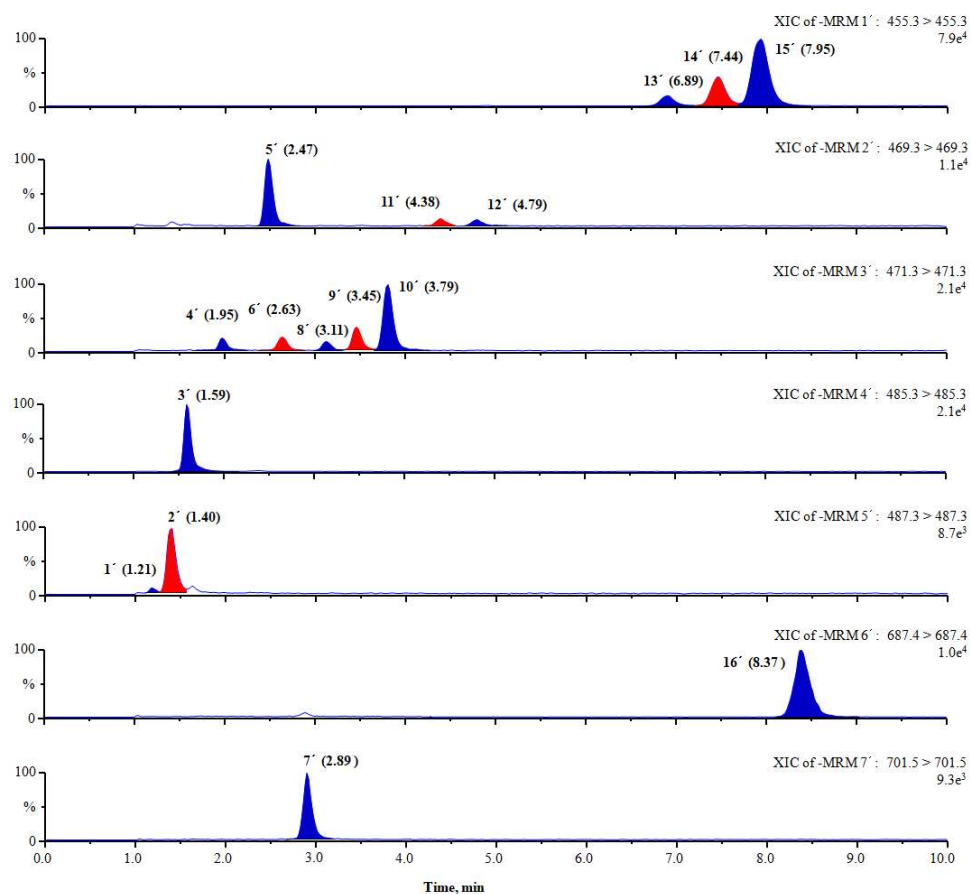

**Figure 2.** Representative MRM chromatograms for 102 polyphenols and 16 triterpenoids in thinned pears.

**Table 1.** The optimized MS parameters at MRM mode and summary of the intra- and inter-day precision for available analytes.

| Compound                             | MS parameters  |        |         | Precision (%) |           |
|--------------------------------------|----------------|--------|---------|---------------|-----------|
|                                      | Ion transition | DP (V) | CE (eV) | Intra-day     | Inter-day |
| Quinic acid                          | 191 > 93       | -105   | -30     | 0.97          | 1.96      |
| Arbutin                              | 317 > 161      | -40    | -20     | 0.87          | 2.46      |
| (+) -Catechin                        | 289 > 289      | -90    | -8      | 0.74          | 2.21      |
| (-) -Epicatechin                     | 289 > 289      | -90    | -8      | 0.44          | 2.56      |
| Chlorogenic acid                     | 353 > 179      | -75    | -25     | 0.93          | 2.14      |
| Cryptochlorogenic acid               | 353 > 179      | -75    | -25     | 1.09          | 2.54      |
| Neochlorogenic acid                  | 353 > 173      | -75    | -25     | 0.83          | 3.19      |
| Isochlorogenic acid A                | 515 > 353      | -90    | -25     | 0.77          | 3.26      |
| Isochlorogenic acid B                | 515 > 353      | -90    | -25     | 0.82          | 2.13      |
| Isochlorogenic acid C                | 515 > 353      | -90    | -25     | 0.43          | 2.47      |
| <i>p</i> -Coumaric acid              | 163 > 163      | -60    | -8      | 1.12          | 1.64      |
| Caffeic acid                         | 179 > 179      | -70    | -8      | 1.07          | 2.56      |
| Rutin                                | 609 > 300      | -150   | -50     | 0.85          | 2.13      |
|                                      | 609 > 609      | -150   | -8      | 0.64          | 2.78      |
| Kaempferol-3- <i>O</i> -rutinoside   | 593 > 285      | -150   | -43     | 1.38          | 2.82      |
|                                      | 593 > 593      | -150   | -8      | 1.09          | 2.33      |
| Isorhamnetin-3- <i>O</i> -rutinoside | 623 > 315      | -135   | -43     | 1.25          | 2.94      |
|                                      | 623 > 623      | -135   | -8      | 1.62          | 2.81      |

|                |           |      |     |      |      |
|----------------|-----------|------|-----|------|------|
| Luteoloside    | 447 > 285 | -135 | -40 | 0.71 | 1.47 |
|                | 447 > 447 | -135 | -8  | 0.94 | 2.55 |
| Hyperoside     | 463 > 300 | -115 | -38 | 0.83 | 2.07 |
| Oleanic acid   | 455 > 455 | -150 | -10 | 0.75 | 1.84 |
| Ursolic acid   | 455 > 455 | -150 | -10 | 0.68 | 2.40 |
| Betulinic acid | 455 > 455 | -150 | -10 | 0.63 | 2.08 |
| Pomolic acid   | 471 > 471 | -150 | -10 | 0.95 | 2.11 |
| Maslinic acid  | 471 > 471 | -150 | -10 | 0.82 | 2.59 |
| Corosolic acid | 471 > 471 | -150 | -10 | 1.13 | 2.86 |

**Table 2.** Repeatability and stability for 102 polyphenols in representative pear extracts.

| Peak NO. | Repeatability (%) |      |      |      | Stability (%) |      |      |      |
|----------|-------------------|------|------|------|---------------|------|------|------|
|          | DSSL              | NGL  | HQL  | SJL  | DSSL          | NGL  | HQL  | SJL  |
| 1        | 2.87              | 2.14 | 2.05 | 1.69 | 1.97          | 1.29 | 1.62 | 2.06 |
| 2        | 2.29              | 2.37 | 1.75 | 2.50 | 2.82          | 1.64 | 1.33 | 1.01 |
| 3        | 2.58              | 2.16 | 2.50 | 2.71 | 1.86          | 1.73 | 1.91 | 1.60 |
| 4        | -                 | -    | 4.90 | 3.06 | -             | -    | 3.24 | 2.47 |
| 5        | 3.49              | 2.09 | 3.30 | 2.50 | 1.84          | 2.39 | 2.71 | 3.09 |
| 6        | 2.68              | 2.75 | 2.40 | 3.20 | 1.74          | 1.99 | 1.29 | 2.74 |
| 7        | -                 | 5.19 | 2.34 | 3.39 | -             | 3.38 | 1.69 | 2.11 |
| 8        | 2.38              | 4.45 | 6.26 | 5.97 | 3.59          | 3.74 | 4.95 | 3.92 |
| 9        | 3.18              | -    | 3.11 | 2.82 | 2.75          | -    | 3.29 | 2.59 |
| 10       | 2.47              | -    | 2.13 | 2.45 | 1.89          | -    | 3.86 | 2.38 |
| 11       | 2.86              | 3.48 | 2.07 | 3.28 | 2.25          | 1.88 | 2.22 | 2.35 |
| 12       | 2.42              | 2.30 | 2.94 | 2.55 | 2.18          | 2.16 | 1.56 | 2.47 |
| 13       | 2.45              | 3.99 | 2.83 | 2.62 | 2.31          | 3.35 | 2.73 | 2.05 |
| 14       | -                 | -    | 4.72 | 3.45 | -             | -    | 2.59 | 2.39 |
| 15       | 2.55              | 2.72 | 3.08 | 3.26 | 2.40          | 1.56 | 1.90 | 2.80 |
| 16       | -                 | -    | 2.50 | 3.17 | -             | -    | 2.21 | 1.67 |
| 17       | -                 | 3.30 | 2.86 | 2.26 | -             | 2.02 | 1.66 | 2.89 |
| 18       | -                 | -    | 2.51 | -    | -             | -    | 2.20 | -    |
| 19       | -                 | -    | 4.86 | 5.96 | -             | -    | 3.37 | 4.80 |
| 20       | 2.97              | 3.51 | 2.81 | 2.82 | 2.47          | 2.34 | 2.07 | 2.59 |
| 21       | 3.26              | 1.72 | 2.45 | 2.65 | 1.42          | 2.68 | 1.43 | 2.90 |
| 22       | 3.48              | 4.26 | 4.18 | 3.67 | 2.29          | 3.07 | 2.02 | 3.05 |
| 23       | 4.91              | 5.18 | 5.29 | 3.12 | 3.93          | 3.84 | 4.67 | 2.95 |
| 24       | 2.65              | 3.07 | 2.23 | 2.55 | 1.27          | 2.42 | 1.68 | 2.30 |
| 25       | 3.34              | 2.14 | 2.90 | 2.91 | 1.97          | 2.54 | 2.58 | 1.68 |
| 26       | 2.29              | 3.62 | 3.84 | 4.20 | 2.30          | 2.51 | 1.86 | 2.47 |
| 27       | 4.51              | 5.74 | 2.63 | 3.14 | 1.97          | 2.32 | 1.62 | 1.95 |
| 28       | 4.04              | 2.12 | 3.89 | 2.73 | 2.27          | 1.37 | 3.64 | 2.05 |
| 29       | 3.38              | 2.14 | 2.98 | 2.39 | 2.72          | 3.33 | 2.34 | 1.93 |
| 30       | -                 | -    | 3.78 | 2.93 | -             | -    | 2.95 | 2.47 |
| 31       | 2.26              | 2.60 | 3.31 | 2.05 | 1.80          | 2.44 | 1.82 | 1.59 |
| 32       | 2.28              | 3.01 | 3.14 | 1.66 | 2.56          | 1.90 | 2.18 | 2.51 |
| 33       | -                 | -    | 2.54 | 3.02 | -             | -    | 1.77 | 2.21 |
| 34       | 2.93              | 4.71 | 3.21 | 3.17 | 2.45          | 4.07 | 2.90 | 2.71 |
| 35       | -                 | -    | 2.67 | 3.37 | -             | -    | 2.22 | 1.63 |
| 36       | 2.87              | 3.34 | 3.02 | 2.98 | 1.98          | 1.68 | 1.29 | 2.50 |
| 37       | 5.09              | 6.87 | 3.32 | 5.17 | 3.38          | 4.73 | 3.99 | 2.77 |
| 38       | 4.71              | 5.74 | -    | -    | 3.95          | 2.80 | -    | -    |
| 39       | -                 | -    | -    | 2.04 | -             | -    | -    | 1.77 |

|    |      |      |      |      |      |      |      |      |
|----|------|------|------|------|------|------|------|------|
| 40 | -    | -    | 4.10 | 5.68 | -    | -    | 2.92 | 3.65 |
| 41 | 3.87 | -    | -    | -    | 3.30 | -    | -    | -    |
| 42 | 2.39 | -    | -    | 2.82 | 1.68 | -    | -    | 1.47 |
| 43 | 2.19 | 3.09 | -    | -    | 2.76 | 3.62 | -    | -    |
| 44 | -    | -    | 3.64 | 5.87 | -    | -    | 2.25 | 1.87 |
| 45 | 3.26 | 2.47 | 2.80 | 3.47 | 3.23 | 2.85 | 2.41 | 2.40 |
| 46 | 4.84 | 4.46 | -    | 7.65 | 4.56 | 4.35 | -    | 4.48 |
| 47 | 2.74 | 3.00 | 2.58 | 3.06 | 2.11 | 2.36 | 1.63 | 1.87 |
| 48 | -    | -    | 2.97 | 2.75 | -    | -    | 2.31 | 1.92 |
| 49 | -    | -    | 3.69 | 4.07 | -    | -    | 2.09 | 3.67 |
| 50 | 4.88 | 4.10 | 2.67 | 3.08 | 4.12 | 5.24 | 3.20 | 2.74 |
| 51 | -    | 4.71 | -    | -    | -    | 4.22 | -    | -    |
| 52 | 3.61 | 3.11 | 2.80 | 2.76 | 1.70 | 2.58 | 1.53 | 1.41 |
| 53 | -    | -    | 4.47 | -    | -    | -    | 1.94 | -    |
| 54 | -    | 3.44 | -    | -    | -    | 2.35 | -    | -    |
| 55 | 3.58 | 4.07 | 5.20 | 3.33 | 1.67 | 4.19 | 2.29 | 1.79 |
| 56 | 2.25 | 3.90 | -    | -    | 1.65 | 2.84 | -    | -    |
| 57 | 2.02 | -    | -    | 3.41 | 1.93 | -    | -    | 2.63 |
| 58 | -    | 3.82 | -    | -    | -    | 2.21 | -    | -    |
| 59 | 2.53 | 3.13 | 4.29 | 2.62 | 2.67 | 1.97 | 1.96 | 2.65 |
| 60 | -    | 2.36 | 3.95 | 3.44 | -    | 1.50 | 2.34 | 2.40 |
| 61 | 2.30 | 3.28 | -    | -    | 2.31 | 2.79 | -    | -    |
| 62 | 2.40 | 3.03 | -    | -    | 1.42 | 2.36 | -    | -    |
| 63 | -    | -    | 2.74 | 4.59 | -    | -    | 1.82 | 2.70 |
| 64 | -    | -    | 4.42 | 6.25 | -    | -    | 2.21 | 3.33 |
| 65 | -    | 3.99 | 5.73 | 4.54 | -    | 2.49 | 3.84 | 3.27 |
| 66 | 2.36 | 3.59 | 2.41 | 3.18 | 2.11 | 2.88 | 1.72 | 2.27 |
| 67 | 2.27 | 3.49 | 4.15 | 2.53 | 2.29 | 1.16 | 3.10 | 2.46 |
| 68 | 1.54 | 4.35 | 6.68 | 6.53 | 1.39 | 4.47 | 3.08 | 5.37 |
| 69 | 1.60 | 2.56 | 3.14 | 2.47 | 2.29 | 2.17 | 2.39 | 1.88 |
| 70 | -    | 2.94 | 2.69 | 3.83 | -    | 2.19 | 1.34 | 2.61 |
| 71 | 1.75 | 2.51 | 2.70 | 3.12 | 2.41 | 3.19 | 2.09 | 2.53 |
| 72 | 4.55 | -    | 4.70 | 4.62 | 3.23 | -    | 2.18 | 2.20 |
| 73 | 4.33 | 5.31 | 2.81 | 3.60 | 3.31 | 2.05 | 2.53 | 2.18 |
| 74 | 1.67 | 4.86 | 2.55 | 2.52 | 1.07 | 2.28 | 2.32 | 1.80 |
| 75 | 2.00 | 1.99 | 2.73 | 2.77 | 1.61 | 2.76 | 1.85 | 1.28 |
| 76 | 4.94 | -    | 5.17 | -    | 3.39 | -    | 3.84 | -    |
| 77 | 4.74 | 3.83 | -    | 4.10 | 1.41 | 1.32 | -    | 2.66 |
| 78 | 2.18 | 3.81 | 3.32 | 4.08 | 1.52 | 2.91 | 1.72 | 1.02 |
| 79 | 3.33 | 4.88 | 2.60 | 3.36 | 2.25 | 2.92 | 2.64 | 2.34 |
| 80 | 3.92 | 4.84 | 2.54 | 2.98 | 1.86 | 4.29 | 1.09 | 1.66 |
| 81 | 3.79 | 5.42 | 4.75 | 4.16 | 1.79 | 3.83 | 1.77 | 1.46 |
| 82 | 2.65 | 3.47 | -    | -    | 3.03 | 1.60 | -    | -    |
| 83 | 3.08 | 3.51 | 3.70 | 3.93 | 2.26 | 2.58 | 2.55 | 2.49 |
| 84 | 1.71 | 2.87 | 2.54 | 1.31 | 1.47 | 1.96 | 1.00 | 1.11 |
| 85 | 4.38 | 4.99 | 3.36 | 3.52 | 2.18 | 4.05 | 3.17 | 1.99 |
| 86 | 3.40 | 4.86 | 3.65 | 3.97 | 1.21 | 1.28 | 2.56 | 2.83 |
| 87 | 4.67 | 2.79 | -    | -    | 1.45 | 1.89 | -    | -    |
| 88 | 2.39 | 3.06 | 5.79 | 4.11 | 2.13 | 2.45 | 2.29 | 1.99 |
| 89 | 5.26 | 3.70 | 4.61 | 5.49 | 2.48 | 2.34 | 2.39 | 3.87 |
| 90 | 2.25 | 1.61 | -    | -    | 1.85 | 1.02 | -    | -    |
| 91 | 3.33 | 2.57 | 2.74 | 2.19 | 2.32 | 1.48 | 3.08 | 1.57 |

|     |      |      |      |      |      |      |      |      |
|-----|------|------|------|------|------|------|------|------|
| 92  | 2.94 | 2.51 | 3.95 | 4.09 | 2.03 | 2.26 | 1.70 | 2.08 |
| 93  | 5.94 | 2.71 | 5.92 | 6.27 | 4.07 | 1.31 | 3.79 | 3.78 |
| 94  | 3.18 | 4.74 | 3.10 | 2.34 | 1.29 | 1.24 | 2.59 | 1.04 |
| 95  | 3.69 | -    | 2.76 | 3.28 | 1.23 | -    | 2.64 | 1.01 |
| 96  | 2.92 | 2.91 | 2.97 | 3.43 | 1.75 | 2.98 | 1.84 | 2.84 |
| 97  | 3.27 | 5.22 | 3.00 | 2.24 | 2.36 | 3.19 | 3.62 | 2.44 |
| 98  | 4.28 | -    | -    | 5.85 | 3.40 | -    | -    | 5.17 |
| 99  | 3.22 | 2.96 | 3.24 | 3.61 | 1.52 | 1.79 | 2.13 | 2.27 |
| 100 | 5.46 | 5.43 | 6.39 | 6.86 | 3.03 | 5.71 | 4.46 | 3.25 |
| 101 | 3.59 | -    | -    | -    | 1.99 | -    | -    | -    |
| 102 | 6.30 | 5.16 | 7.29 | 5.57 | 6.74 | 5.15 | 5.23 | 5.16 |

**Table 3.** Repeatability and stability for 16 triterpenoids in representative pear extracts.

| Peak NO. | Repeatability (%) |      | Stability (%) |      |
|----------|-------------------|------|---------------|------|
|          | YL                | NGL  | YL            | NGL  |
| 1'       | -                 | 5.65 | -             | 2.37 |
| 2'       | 3.04              | 3.46 | 1.94          | 2.15 |
| 3'       | 3.74              | 4.14 | 1.40          | 2.01 |
| 4'       | 2.70              | 2.11 | 2.60          | 2.09 |
| 5'       | 2.84              | 4.03 | 2.16          | 2.99 |
| 6'       | 4.02              | 3.93 | 1.61          | 1.83 |
| 7'       | 3.06              | 4.18 | 1.45          | 1.98 |
| 8'       | 3.31              | 4.43 | 1.12          | 1.84 |
| 9'       | 3.53              | 3.91 | 2.48          | 2.06 |
| 10'      | 3.86              | 4.12 | 2.79          | 2.51 |
| 11'      | 4.05              | -    | 1.71          | -    |
| 12'      | 4.58              | -    | 1.08          | -    |
| 13'      | 3.99              | 2.85 | 1.78          | 1.92 |
| 14'      | 2.91              | 2.10 | 2.28          | 1.14 |
| 15'      | 2.15              | 2.59 | 1.73          | 1.35 |
| 16'      | 2.50              | 3.53 | 1.62          | 1.73 |

**Table 4.** The correlation coefficients between antioxidant activity and chemical compounds in thinned young pears.

| Peak NO. | Compound                           | Correlation coefficient | Peak NO. | Compound                                        | Correlation coefficient |
|----------|------------------------------------|-------------------------|----------|-------------------------------------------------|-------------------------|
|          | <i>Phenolic acid</i>               |                         |          | <i>Phenolic glycoside</i>                       |                         |
| 1        | Quinic acid                        | -0.265                  | 3        | Arbutin                                         | 0.013                   |
| 2        | Cinnamic acid isomer               | 0.322                   | 6        | Dihydro-caffeoyl- <i>O</i> -hexoside            | 0.193                   |
| 5        | Cryptochlorogenic acid             | 0.187                   | 8        | Hydroxyphenylpropionic acid- <i>O</i> -hexoside | 0.153                   |
| 10       | Caffeoylglycerol                   | 0.036                   | 9        | Syringic acid- <i>O</i> -hexoside               | 0.015                   |
| 13       | Chlorogenic acid                   | 0.566                   | 11       | Dihydro-caffeoyl- <i>O</i> -hexoside            | -0.429                  |
| 15       | Neochlorogenic acid                | 0.401                   | 21       | Caffeoyl- <i>O</i> -hexoside                    | 0.079                   |
| 16       | <i>p</i> -Coumaroylcaffeoyl malate | 0.607                   | 23       | Roseoside                                       | 0.352                   |
| 20       | 1- <i>O</i> -Caffeoylquinic acid   | 0.784                   | 26       | Syringic acid- <i>O</i> -hexoside               | 0.780                   |
| 22       | Caffeoylshikimic acid              | -0.103                  | 39       | Caffeoylarbutin                                 | 0.043                   |
| 25       | 4- <i>p</i> -Coumaroylquinic acid  | 0.752                   | 42       | Caffeoylarbutin                                 | -0.723                  |
| 28       | Caffeoylshikimic acid              | -0.276                  | 46       | Syringic acid- <i>O</i> -hexoside               | -0.156                  |



|                      |                                                  |        |                           |                                 |        |
|----------------------|--------------------------------------------------|--------|---------------------------|---------------------------------|--------|
| 31                   | 3- <i>O</i> -Feruloylquinic acid                 | 0.400  | 57                        | Caffeoylarbutin                 | -0.766 |
| 32                   | Caffeoyl-malonyl-methylcitric acid               | 0.398  | 68                        | <i>p</i> -Coumaroylarbutin      | -0.712 |
| 34                   | 5- <i>p</i> -Coumaroylquinic acid                | 0.671  | 85                        | <i>p</i> -Coumaroylarbutin      | -0.737 |
| 36                   | 4- <i>O</i> -Caffeoylquinic acid methyl ester    | 0.509  | 100                       | Galloyl-coumaric acid pentoside | 0.444  |
| 47                   | Hydroxycinnamic acid                             | 0.460  | 102                       | Galloyl-coumaric acid pentoside | 0.608  |
| 48                   | 3- <i>O</i> -Caffeoylquinic acid methyl ester    | 0.495  | <hr/> <i>Flavan-3-ol</i>  |                                 |        |
| 54                   | <i>p</i> -Coumaroylcaffeoylquinic acid           | -0.095 | 4                         | A-type procyanidin dimer        | 0.632  |
| 58                   | <i>p</i> -Coumaroylcaffeoylquinic acid           | -0.117 | 7                         | B-type procyanidin dimer        | 0.562  |
| 61                   | Di- <i>O</i> -caffeoylquinic acid                | -0.308 | 12                        | (+) -Catechin                   | 0.404  |
| 69                   | 5- <i>O</i> -Caffeoylquinic acid methyl ester    | 0.196  | 14                        | B-type procyanidin trimer       | 0.492  |
| 71                   | Caffeoyl-malonyl-methylcitric acid               | 0.209  | 17                        | B-type procyanidin dimer        | 0.625  |
| 76                   | Isochlorogenic acid B                            | 0.454  | 18                        | B-type procyanidin trimer       | 0.651  |
| 83                   | Isochlorogenic acid A                            | 0.227  | 19                        | A-type procyanidin trimer       | 0.675  |
| 89                   | <i>p</i> -Coumaroylcaffeoylquinic acid           | 0.588  | 24                        | (-) -Epicatechin                | 0.653  |
| 92                   | Isochlorogenic acid C                            | -0.265 | 27                        | A-type procyanidin trimer       | 0.383  |
| 97                   | <i>p</i> -Coumaroylcaffeoylquinic acid           | 0.371  | 29                        | A-type procyanidin trimer       | 0.650  |
| 99                   | 1- <i>O</i> -Caffeoylquinic acid methyl ester    | 0.356  | 30                        | A-type procyanidin dimer        | 0.649  |
| <hr/> <i>Flavone</i> |                                                  |        | 33                        | B-type procyanidin trimer       | 0.610  |
| 38                   | Quercetin-3- <i>O</i> -xylosylrhamnosylglucoside | -0.737 | 35                        | B-type procyanidin dimer        | 0.492  |
| 41                   | Isorhamnetin-acylated-hexoside                   | -0.689 | 37                        | A-type procyanidin dimer        | 0.538  |
| 43                   | Quercetin-3- <i>O</i> -arabinosylgalactoside     | -0.577 | 40                        | B-type procyanidin tetramer     | 0.630  |
| 49                   | Quercetin-3- <i>O</i> -arabinosylglucoside       | 0.576  | 44                        | A-type procyanidin trimer       | 0.488  |
| 50                   | Quercetin-3- <i>O</i> -rhamnosylgalactoside      | 0.641  | 45                        | A-type procyanidin dimer        | 0.394  |
| 51                   | Luteolin-7- <i>O</i> -galactoside                | 0.154  | 53                        | B-type procyanidin trimer       | 0.651  |
| 52                   | Rutin                                            | 0.379  | 60                        | B-type procyanidin dimer        | 0.612  |
| 55                   | Hyperoside                                       | 0.610  | 63                        | B-type procyanidin trimer       | 0.576  |
| 56                   | Kaempferol-3- <i>O</i> -rhamnosylgalactoside     | -0.070 | 66                        | A-type procyanidin dimer        | 0.669  |
| 59                   | Quercetin-3- <i>O</i> -glucoside                 | 0.547  | 67                        | A-type procyanidin trimer       | 0.244  |
| 62                   | Luteoloside                                      | -0.286 | 70                        | A-type procyanidin trimer       | 0.619  |
| 64                   | Kaempferol-3- <i>O</i> -rhamnosylglucoside       | 0.576  | 84                        | A-type procyanidin dimer        | 0.688  |
| 65                   | Apigenin- <i>O</i> -glucuronide or isomer        | 0.615  | 91                        | A-type procyanidin trimer       | 0.550  |
| 72                   | Apigenin- <i>O</i> -glucuronide or isomer        | -0.322 | <hr/> <i>Triterpenoid</i> |                                 |        |

|     |                                                |        |     |                                                |        |
|-----|------------------------------------------------|--------|-----|------------------------------------------------|--------|
| 73  | Kaempferol-3- <i>O</i> -rutinoside             | 0.656  | 1'  | Euscaphic acid                                 | -0.525 |
| 74  | Quercetin-acylated-galactoside                 | 0.660  | 2'  | Tormentic acid                                 | 0.238  |
| 75  | Isorhamnetin-3- <i>O</i> -rhamnosylgalactoside | 0.134  | 3'  | Anmurcoic acid                                 | -0.091 |
| 77  | Apigenin rutinoside                            | 0.117  | 4'  | Pomolic acid or isomer                         | -0.205 |
| 78  | Isorhamnetin-3- <i>O</i> -rutinoside           | -0.460 | 5'  | 1-Hydroxy-3-oxours-12-en-28-oic acid or isomer | 0.026  |
| 79  | Kaempferol-3- <i>O</i> -galactoside            | 0.467  | 6'  | Pomolic acid or isomer                         | 0.001  |
| 80  | Quercetin-acylated-glucoside                   | 0.622  | 7'  | 701 <i>m/z</i> [M-H] <sup>-</sup>              | 0.407  |
| 81  | Isorhamnetin-3- <i>O</i> -galactoside          | 0.184  | 8'  | Alphitolic acid                                | -0.274 |
| 82  | Chrysoeriol-7-neohesperidoside                 | -0.017 | 9'  | Maslinic acid                                  | 0.206  |
| 86  | Isorhamnetin-3- <i>O</i> -glucoside            | 0.163  | 10' | Corosolic acid                                 | 0.570  |
| 87  | Kaempferol-3- <i>O</i> -glucoside              | 0.126  | 11' | 1-Hydroxy-3-oxours-12-en-28-oic acid or isomer | 0.058  |
| 88  | Apigenin- <i>O</i> -hexoside                   | 0.096  | 12' | 1-Hydroxy-3-oxours-12-en-28-oic acid or isomer | -0.321 |
| 90  | Chrysoeriol-7- <i>O</i> -galactoside           | -0.322 | 13' | Betulinic acid                                 | -0.471 |
| 93  | Chrysoeriol-7- <i>O</i> -glucoside             | 0.163  | 14' | Oleanolic acid                                 | -0.614 |
| 94  | Kaempferol-acylated-galactoside                | 0.664  | 15' | Ursolic acid                                   | -0.108 |
| 95  | Isorhamnetin-acylated-galactoside              | 0.332  | 16' | 687 <i>m/z</i> [M-H] <sup>-</sup>              | 0.218  |
| 96  | Isorhamnetin-acylated-glucoside                | 0.312  |     |                                                |        |
| 98  | Kaempferol-acylated-glucoside                  | -0.483 |     |                                                |        |
| 101 | Phloretin-acylated-hexoside                    | -0.644 |     |                                                |        |

---
